# Supplementary material for: Genomic Characterization of Antimicrobial Resistance, Virulence, and Phylogeny of the Genus Ochrobactrum
Source: PubMed Central journal article supplement (PMC7235858; doi:10.3390/antibiotics9040177), 2020-04-13
Supplement: antibiotics-09-00177-s001.pdf [file antibiotics-09-00177-s001.pdf]

**Table S1.** Metadata of 125 publicly available genomes

| Genome ID               | Species using ANI | Source of isolation | Isolation Country | Region        |
|-------------------------|-------------------|---------------------|-------------------|---------------|
| 1151114.3               | anthropi/lupini   | NA                  | NA                | NA            |
| 1234597.14 / SRR2961886 | intermedium       | Human               | India             | Asia          |
| 1234597.4               | intermedium       | Human               | India             | Asia          |
| 1337887.3               | intermedium       | Human               | India             | Asia          |
| 1390361.3               | intermedium       | Environment         | India             | Asia          |
| 1437448.3               | rhizosphaerae     | Environment         | China             | Asia          |
| 1444311.3               | intermedium       | Environment         | China             | Asia          |
| 1449061.3               | anthropi/lupini   | NA                  |                   | NA            |
| 1707152.3               | intermedium       | Environment         | India             | Asia          |
| 1720558.3               | anthropi/lupini   | Environment         | China             | Asia          |
| 1827297.5 / SRR6003490  | Unassigned        | Animal              | Germany           | Europe        |
| 1830124.3               | Unassigned        | Environment         | China             | Asia          |
| 1848699.3 / SRR6003504  | rhizosphaerae     | Animal              | Germany           | Europe        |
| 1848700.3 / SRR6003493  | rhizosphaerae     | Animal              | Germany           | Europe        |
| 1848701.3 / SRR6003492  | rhizosphaerae     | Animal              | Germany           | Europe        |
| 1848702.3 / SRR6003494  | rhizosphaerae     | Animal              | Germany           | Europe        |
| 1848703.3 / SRR6003486  | rhizosphaerae     | Animal              | Germany           | Europe        |
| 1848704.3 / SRR6003453  | anthropi/lupini   | Animal              | Germany           | Europe        |
| 1920636.3               | Unassigned        | Environment         | Argentina         | South America |
| 1947010.3               | intermedium       | Environment         | United States     | North America |
| 1947011.3               | intermedium       | Environment         | United States     | North America |
| 2033031.3 / SRR6003525  | pseudogrignonense | Animal              | Germany           | Europe        |
| 2038104.3               | intermedium       | NA                  | Nigeria           | Africa        |
| 2038105.3               | intermedium       | NA                  | Nigeria           | Africa        |
| 2038106.3               | intermedium       | NA                  | Nigeria           | Africa        |
| 2038107.3               | intermedium       | NA                  | Nigeria           | Africa        |
| 2038108.3               | intermedium       | NA                  | Nigeria           | Africa        |
| 2038109.3               | intermedium       | NA                  | Pakistan          | Asia          |
| 2038110.3               | intermedium       | NA                  | Pakistan          | Asia          |
| 2038111.3               | intermedium       | NA                  | Pakistan          | Asia          |
| 2042474.3 / SRR6003496  | rhizosphaerae     | Animal              | Germany           | Europe        |
| 215590.7                | gallinifacis      | NA                  | NA                | NA            |
| Genome ID               | Species using ANI | Source of isolation | Isolation Country | Region        |
| 2203419.3               | Unassigned        | Environment         | Poland            | Europe        |
| 2316647.3 / SRR7867373  | anthropi/lupini   | Environment         | China             | Asia          |
| 2448455.3               | Unassigned        | Environment         | South Korea       | Asia          |

| 2479765.3              | Unassigned               | NA                         | China                    | Asia          |
|------------------------|--------------------------|----------------------------|--------------------------|---------------|
| 2485134.3 / SRR8392523 | Unassigned               | NA                         | USA                      | North America |
| 255457.3               | anthropi/lupini          | Plant                      | Argentina                | South America |
| 255457.6               | anthropi/lupini          | Plant                      | Argentina                | South America |
| 2583453.3              | Unassigned               | Environment                | NA                       | NA            |
| 2650567.3              | intermedium              | Human                      | NA                       | NA            |
| 2650568.3              | haematophilum            | Human                      | Afghanistan              | Asia          |
| 271865.3               | Unassigned               | Plant                      | Netherlands              | Europe        |
| 271865.6               | Unassigned               | Plant                      | NA                       | Europe        |
| 335286.3               | oryzae                   | Human                      | Brazil                   | South America |
| 360313.3               | pseudogrignonense        | Environment                | Australia                | Oceania       |
| 370111.3               | pseudintermedium         | Environment                | NA                       | NA            |
| 407152.3 / SRR5003446  | cytisi                   | Plant                      | Russia                   | Asia          |
| 419474.10              | haematophilum            | Human                      | NA                       | NA            |
| 419474.7               | Unassigned               | Plant                      | Nigeria                  | Africa        |
| 419474.9               | Unassigned               | NA                         | NA                       | NA            |
| 419475.13              | pseudogrignonense        | Human                      | Sweden                   | Europe        |
| 419475.15 / SRR6003466 | pseudogrignonense        | Animal                     | Germany                  | Europe        |
| 419475.16 / SRR6003449 | pseudogrignonense        | Animal                     | Germany                  | Europe        |
| 419475.17 / SRR6003478 | pseudogrignonense        | Animal                     | Germany                  | Europe        |
| 419475.19              | pseudogrignonense        | Human                      | NA                       | NA            |
| 419475.3               | pseudogrignonense        | Environment                | Malaysia                 | Asia          |
| 42190.13 / SRR6485881  | intermedium              | Environment                | NA                       | NA            |
| 439375.7               | anthropi                 | NA                         | NA                       | NA            |
| 529.12                 | tritici                  | Environment                | United States            | North America |
| 529.33                 | anthropi/lupini          | Environment                | United States            | North America |
| 529.35                 | anthropi                 | Environment                | United States            | North America |
| 529.36                 | anthropi/lupini          | Environment                | United States            | North America |
| 529.37                 | anthropi/lupini          | Environment                | United States            | North America |
| 529.38                 | anthropi                 | Environment                | United States            | North America |
| <b>Genome ID</b>       | <b>Species using ANI</b> | <b>Source of isolation</b> | <b>Isolation Country</b> | <b>Region</b> |
| 529.39                 | anthropi                 | Environment                | United States            | North America |
| 529.40                 | anthropi/lupini          | Environment                | United States            | North America |
| 529.41                 | anthropi                 | Environment                | United States            | North America |
| 529.42                 | anthropi/lupini          | Environment                | United States            | North America |
| 529.6                  | anthropi/lupini          | Environment                | China                    | Asia          |
| 529.62                 | anthropi/lupini          | Environment                | Spain                    | Europe        |
| 529.63 / SRR6487964    | anthropi                 | Environment                | NA                       | NA            |
| 529.64                 | anthropi                 | NA                         | NA                       | NA            |

| 529.7                  | anthropi                 | NA                         | NA                       | NA            |
|------------------------|--------------------------|----------------------------|--------------------------|---------------|
| 529.70                 | anthropi                 | Environment                | Pakistan                 | Asia          |
| 529.71                 | anthropi                 | Environment                | Pakistan                 | Asia          |
| 529.78                 | anthropi/lupini          | Environment                | NA                       | NA            |
| 529.79                 | anthropi                 | Environment                | NA                       | NA            |
| 529.8                  | anthropi/lupini          | Environment                | Vietnam                  | Asia          |
| 529.80                 | anthropi/lupini          | Human                      | NA                       | NA            |
| 529.81                 | anthropi                 | Human                      | NA                       | NA            |
| 529.82                 | anthropi/lupini          | Human                      | NA                       | NA            |
| 529.83                 | anthropi                 | Human                      | NA                       | NA            |
| 529.84                 | anthropi/lupini          | Human                      | NA                       | NA            |
| 529.85                 | anthropi                 | Human                      | NA                       | NA            |
| 529.86                 | anthropi                 | Human                      | USA                      | North America |
| 529.87                 | anthropi/lupini          | Environment                | Sweden                   | Europe        |
| 529.88                 | anthropi/lupini          | Environment                | NA                       | NA            |
| 529.89                 | anthropi/lupini          | Human                      | Norway                   | Europe        |
| 529.90                 | anthropi/lupini          | Human                      | NA                       | NA            |
| 529.91                 | anthropi                 | Human                      | Sweden                   | Europe        |
| 529.92                 | anthropi/lupini          | NA                         | NA                       | NA            |
| 529.93                 | anthropi/lupini          | Animal                     | Czech Republic           | Europe        |
| 529.94                 | anthropi/lupini          | Environment                | France                   | Europe        |
| 529.95                 | anthropi/lupini          | Plant                      | South Korea              | Asia          |
| 571254.3               | Unassigned               | Plant                      | Australia                | Oceania       |
| 571255.10 / SRR6003475 | rhizosphaerae            | Animal                     | Germany                  | Europe        |
| 571255.8               | thiophenivorans          | Environment                | Germany                  | Europe        |
| <b>Genome ID</b>       | <b>Species using ANI</b> | <b>Source of isolation</b> | <b>Isolation Country</b> | <b>Region</b> |
| 571256.17              | rhizosphaerae            | Environment                | Tunisia                  | Africa        |
| 571256.25              | rhizosphaerae            | Environment                | NA                       | NA            |
| 571256.9               | puitosum                 | Plant                      | United States            | North America |
| 586218.3 / SRR8450062  | rhizosphaerae            | Environment                | NA                       | NA            |
| 641118.3               | intermedium              | NA                         | NA                       | NA            |
| 867683.3               | pecoris                  | NA                         | NA                       | NA            |
| 936132.4 / SRR3929697  | pseudintermedium         | NA                         | NA                       | NA            |
| 94625.13               | intermedium              | NA                         | NA                       | NA            |
| 94625.19               | intermedium              | Environment                | NA                       | NA            |
| 94625.20               | intermedium              | Environment                | France                   | Europe        |
| 94625.21               | intermedium              | Environment                | NA                       | NA            |
| 94625.22               | intermedium              | Human                      | NA                       | NA            |
| 94625.23               | intermedium              | Human                      | NA                       | NA            |

|            |                  |             |               |               |
|------------|------------------|-------------|---------------|---------------|
| 94625.24   | intermedium      | NA          | NA            | NA            |
| 94625.25   | intermedium      | Environment | USA           | North America |
| 94625.5    | intermedium      | Environment | China         | Asia          |
| 94625.6    | intermedium      | Animal      | United States | North America |
| 94625.7    | intermedium      | Environment | Saudi Arabia  | Asia          |
| 94625.9    | intermedium      | Environment | United States | North America |
| 94626.10   | tritici          | Plant       | NA            | NA            |
| 94626.7    | tritici          | Human       | NA            | NA            |
| 94626.8    | tritici          | Environment | NA            | NA            |
| 94626.9    | tritici          | Plant       | France        | Europe        |
| 94627.10   | grignonense      | Environment | France        | Europe        |
| SRR1798201 | anthropi/lupini  | NA          | NA            | NA            |
| SRR3928092 | pseudintermedium | NA          | NA            | NA            |
| SRR7168035 | Unassigned       | NA          | NA            | NA            |

---

**Table S2.** Sequencing data for all samples

| <b>Name</b> | <b>No.</b> | <b>Base Pairs</b> | <b>OK</b> | <b>NS</b> | <b>Gaps</b> | <b>Min</b> | <b>Avg</b> | <b>Max</b> | <b>N50</b> |
|-------------|------------|-------------------|-----------|-----------|-------------|------------|------------|------------|------------|
| OCH-ISR1    | 53         | 4607187           | 4607187   | 0         | 0           | 205        | 86928      | 912538     | 427705     |
| OCH-ISR2    | 115        | 4758714           | 4758714   | 0         | 0           | 200        | 41380      | 500181     | 308273     |
| OCH-ISR3    | 171        | 4270779           | 4270779   | 0         | 0           | 201        | 24975      | 476636     | 240761     |
| OCH-ISR4    | 71         | 4807944           | 4807944   | 0         | 0           | 200        | 67717      | 874803     | 363912     |
| OCH-ISR5    | 52         | 4904698           | 4904698   | 0         | 0           | 203        | 94321      | 830669     | 397644     |
| 1151114.3   | 47         | 4712978           | 4712978   | 0         | 0           | 205        | 100276     | 726895     | 316618     |
| 1234597.4   | 148        | 5188688           | 5188688   | 0         | 0           | 392        | 35058      | 224875     | 78024      |
| 1337887.3   | 378        | 4808223           | 4808223   | 0         | 0           | 202        | 12720      | 71323      | 19057      |
| 1390361.3   | 54         | 4839722           | 4839722   | 0         | 0           | 1008       | 89624      | 509970     | 261374     |
| 1437448.3   | 198        | 5245769           | 5245769   | 0         | 0           | 547        | 26493      | 471969     | 107455     |
| 1444311.3   | 95         | 4800175           | 4800175   | 0         | 0           | 501        | 50528      | 671480     | 194604     |
| 1449061.3   | 16         | 4624630           | 4624630   | 0         | 0           | 2205       | 289039     | 1577432    | 1053978    |
| 1707152.3   | 11         | 4660061           | 4658888   | 1173      | 0           | 733        | 423641     | 2550118    | 2550118    |
| 1720558.3   | 24         | 4630364           | 4627175   | 3189      | 0           | 1071       | 192931     | 1135771    | 585052     |
| 1830124.3   | 36         | 4951322           | 4951322   | 0         | 0           | 595        | 137536     | 1062924    | 467496     |
| 1920636.3   | 65         | 5253132           | 5253132   | 0         | 0           | 1037       | 80817      | 445701     | 242240     |
| 1947010.3   | 111        | 4571323           | 4567906   | 3417      | 0           | 2565       | 41183      | 431507     | 88603      |
| 1947011.3   | 23         | 4544042           | 4542736   | 1306      | 0           | 6110       | 197567     | 755421     | 430760     |
| 2038104.3   | 13         | 4935855           | 4935855   | 0         | 0           | 22541      | 379681     | 1951974    | 855839     |
| 2038105.3   | 19         | 4937528           | 4937528   | 0         | 0           | 18479      | 259869     | 1698597    | 946216     |
| 2038106.3   | 18         | 4936674           | 4936674   | 0         | 0           | 20660      | 274259     | 1419977    | 451323     |
| 2038107.3   | 18         | 4936858           | 4936858   | 0         | 0           | 2989       | 274269     | 1330586    | 495115     |
| 2038108.3   | 18         | 4938583           | 4938583   | 0         | 0           | 1704       | 274365     | 1614757    | 999630     |
| 2038109.3   | 22         | 4855883           | 4855883   | 0         | 0           | 708        | 220721     | 1307228    | 793849     |
| 2038110.3   | 23         | 4856529           | 4856529   | 0         | 0           | 1667       | 211153     | 1037751    | 671229     |
| 2038111.3   | 24         | 4860377           | 4860377   | 0         | 0           | 782        | 202515     | 1124918    | 431306     |
| 215590.7    | 37         | 3742416           | 3742406   | 10        | 0           | 1225       | 101146     | 495126     | 373399     |
| 2203419.3   | 255        | 4969575           | 4969575   | 0         | 0           | 204        | 19488      | 507722     | 182332     |
| 2448455.3   | 48         | 5024120           | 5024120   | 0         | 0           | 1516       | 104669     | 888782     | 359264     |
| 2479765.3   | 43         | 4760804           | 4760804   | 0         | 0           | 1107       | 110716     | 909449     | 262310     |
| 255457.3    | 65         | 5582813           | 5582811   | 2         | 0           | 330        | 85889      | 624561     | 209686     |
| 255457.6    | 100        | 5430960           | 5430960   | 0         | 0           | 217        | 54309      | 624829     | 208867     |
| <b>Name</b> | <b>No.</b> | <b>Base Pairs</b> | <b>OK</b> | <b>NS</b> | <b>Gaps</b> | <b>Min</b> | <b>Avg</b> | <b>Max</b> | <b>N50</b> |
| 2583453.3   | 51         | 4602745           | 4601991   | 754       | 0           | 293        | 90249      | 1011582    | 484801     |
| 2650567.3   | 15         | 4611544           | 4611544   | 0         | 0           | 233        | 307436     | 1585708    | 1454747    |
| 2650568.3   | 56         | 4695774           | 4694721   | 1053      | 0           | 536        | 83853      | 689592     | 332982     |
| 271865.3    | 4          | 5645291           | 5645291   | 0         | 0           | 19701      | 1411322    | 2585393    | 2008185    |
| 271865.6    | 77         | 5052642           | 5052642   | 0         | 0           | 600        | 65618      | 445155     | 173928     |
| 335286.3    | 289        | 4467006           | 4467006   | 0         | 0           | 201        | 15456      | 328852     | 137902     |

| 360313.3  | 146 | 4971228    | 4971215 | 13    | 0    | 530     | 34049   | 350235  | 51173   |
|-----------|-----|------------|---------|-------|------|---------|---------|---------|---------|
| 370111.3  | 45  | 4394636    | 4394636 | 0     | 0    | 253     | 97658   | 531236  | 231484  |
| 419474.1  | 55  | 5503262    | 5503262 | 0     | 0    | 1005    | 100059  | 597669  | 276154  |
| 419474.7  | 5   | 5482303    | 5482303 | 0     | 0    | 181071  | 1096460 | 2602474 | 1396538 |
| 419474.9  | 3   | 4910164    | 4910164 | 0     | 0    | 878348  | 1636721 | 2596063 | 2596063 |
| 419475.13 | 53  | 5531562    | 5531557 | 5     | 0    | 307     | 104369  | 803971  | 250510  |
| 419475.19 | 35  | 4979464    | 4979464 | 0     | 0    | 219     | 142270  | 2159127 | 516269  |
| 419475.3  | 2   | 4992805    | 4992805 | 0     | 0    | 1042249 | 2496402 | 3950556 | 3950556 |
| 529.12    | 17  | 4538068    | 4538068 | 0     | 0    | 2482    | 266945  | 954155  | 457312  |
| 529.33    | 35  | 4977838    | 4976691 | 1147  | 0    | 11382   | 142223  | 691589  | 241376  |
| 529.35    | 50  | 4910867    | 4910245 | 622   | 0    | 3412    | 98217   | 645142  | 172659  |
| 529.36    | 294 | 4124508    | 4065967 | 58541 | 0    | 2600    | 14028   | 98123   | 21770   |
| 529.37    | 33  | 4802997    | 4802648 | 349   | 0    | 3415    | 145545  | 598764  | 313066  |
| 529.38    | 331 | 3813327    | 3767972 | 45355 | 0    | 2502    | 11520   | 237540  | 18108   |
| 529.39    | 28  | 4599886    | 4599395 | 491   | 0    | 4427    | 164281  | 699371  | 250386  |
| 529.4     | 36  | 5074424    | 5073489 | 935   | 0    | 5391    | 140956  | 813451  | 346568  |
| 529.41    | 64  | 4796060    | 4794106 | 1954  | 0    | 3246    | 74938   | 592744  | 154656  |
| 529.42    | 26  | 4584499    | 4583647 | 852   | 0    | 6512    | 176326  | 588006  | 313749  |
| 529.6     | 43  | 5277818    | 5277767 | 51    | 0    | 744     | 122739  | 1032997 | 475065  |
| 529.62    | 26  | 4904693    | 4904693 | 0     | 0    | 241     | 188642  | 1441125 | 688210  |
| 529.64    | 5   | 5239764    | 5239764 | 0     | 0    | 18066   | 1047952 | 2887299 | 2887299 |
| 529.7     | 4   | 4901165    | 4901165 | 0     | 0    | 106739  | 1225291 | 2708454 | 2708454 |
| 529.7     | 41  | 5066712    | 5066604 | 108   | 0    | 500     | 123578  | 1080236 | 458212  |
| 529.71    | 79  | 5020564    | 5020267 | 297   | 0    | 536     | 63551   | 1063111 | 246939  |
| 529.78    | 12  | 4806735    | 4806735 | 0     | 0    | 1223    | 400561  | 1323744 | 735006  |
| 529.79    | 70  | 4978335    | 4978335 | 0     | 0    | 214     | 71119   | 974321  | 372678  |
| 529.8     | 74  | 4904177    | 4903623 | 554   | 0    | 334     | 66272   | 353539  | 169533  |
| Name      | No. | Base Pairs | OK      | NS    | Gaps | Min     | Avg     | Max     | N50     |
| 529.8     | 10  | 4808150    | 4808150 | 0     | 0    | 1225    | 480815  | 1332311 | 1072008 |
| 529.81    | 20  | 4854606    | 4854606 | 0     | 0    | 853     | 242730  | 1080266 | 820730  |
| 529.82    | 23  | 5007797    | 5007797 | 0     | 0    | 244     | 217730  | 1823879 | 1110195 |
| 529.83    | 76  | 5191372    | 5191372 | 0     | 0    | 248     | 68307   | 1079029 | 827187  |
| 529.84    | 161 | 5313857    | 5313857 | 0     | 0    | 218     | 33005   | 447321  | 175282  |
| 529.85    | 41  | 4912846    | 4912846 | 0     | 0    | 655     | 119825  | 1010885 | 372678  |
| 529.86    | 33  | 4958302    | 4958302 | 0     | 0    | 236     | 150251  | 1179809 | 1000334 |
| 529.87    | 37  | 4904887    | 4904887 | 0     | 0    | 216     | 132564  | 1137031 | 734175  |
| 529.88    | 31  | 4797768    | 4797768 | 0     | 0    | 654     | 154766  | 988204  | 450509  |
| 529.89    | 51  | 5446543    | 5446543 | 0     | 0    | 206     | 106794  | 1061732 | 557659  |
| 529.9     | 27  | 5142012    | 5142012 | 0     | 0    | 8438    | 190444  | 893633  | 380842  |
| 529.91    | 65  | 5179000    | 5179000 | 0     | 0    | 236     | 79676   | 1051120 | 489086  |
| 529.92    | 72  | 5119314    | 5119314 | 0     | 0    | 247     | 71101   | 624101  | 215355  |
| 529.93    | 21  | 4839150    | 4839150 | 0     | 0    | 246     | 230435  | 1289013 | 810703  |

| 529.94     | 17  | 4813838    | 4813838 | 0    | 0    | 221     | 283166  | 1323418 | 735006  |
|------------|-----|------------|---------|------|------|---------|---------|---------|---------|
| 529.95     | 2   | 4736879    | 4736879 | 0    | 0    | 2090924 | 2368439 | 2645955 | 2645955 |
| 571254.3   | 36  | 4904011    | 4904011 | 0    | 0    | 314     | 136222  | 978742  | 440158  |
| 571255.8   | 77  | 4364783    | 4364781 | 2    | 0    | 362     | 56685   | 679617  | 168659  |
| 571256.17  | 9   | 4885407    | 4884207 | 1200 | 0    | 2471    | 542823  | 2480539 | 2480539 |
| 571256.25  | 60  | 5170436    | 5170436 | 0    | 0    | 429     | 86173   | 908092  | 382153  |
| 571256.9   | 4   | 5467370    | 5467370 | 0    | 0    | 332144  | 1366842 | 2385017 | 1716190 |
| 641118.3   | 4   | 4725392    | 4725392 | 0    | 0    | 60172   | 1181348 | 2604449 | 2604449 |
| 867683.3   | 61  | 5057340    | 5057340 | 0    | 0    | 1057    | 82907   | 683678  | 283806  |
| 94625.13   | 3   | 4727886    | 4727886 | 0    | 0    | 59782   | 1575962 | 2608764 | 2608764 |
| 94625.19   | 67  | 4444120    | 4444120 | 0    | 0    | 215     | 66330   | 1020404 | 681751  |
| 94625.2    | 60  | 4851039    | 4851039 | 0    | 0    | 205     | 80850   | 988702  | 495364  |
| 94625.21   | 36  | 4531554    | 4531554 | 0    | 0    | 212     | 125876  | 1109134 | 897116  |
| 94625.22   | 99  | 4644694    | 4644694 | 0    | 0    | 200     | 46916   | 1131370 | 425471  |
| 94625.23   | 26  | 4479370    | 4479370 | 0    | 0    | 270     | 172283  | 987372  | 498616  |
| 94625.24   | 83  | 4846268    | 4846268 | 0    | 0    | 207     | 58388   | 864912  | 470435  |
| 94625.25   | 33  | 4975626    | 4975626 | 0    | 0    | 619     | 150776  | 1160471 | 513832  |
| 94625.5    | 48  | 3938898    | 3938898 | 0    | 0    | 236     | 82060   | 982890  | 419558  |
| 94625.6    | 47  | 4703586    | 4703586 | 0    | 0    | 240     | 100076  | 907708  | 669681  |
| Name       | No. | Base Pairs | OK      | NS   | Gaps | Min     | Avg     | Max     | N50     |
| 94625.7    | 38  | 4913201    | 4913201 | 0    | 0    | 1164    | 129294  | 636235  | 419572  |
| 94625.9    | 10  | 4076837    | 4075896 | 941  | 0    | 130074  | 407683  | 769395  | 579011  |
| 94626.1    | 74  | 5887706    | 5887706 | 0    | 0    | 6915    | 79563   | 497894  | 135011  |
| 94626.7    | 141 | 4968050    | 4968050 | 0    | 0    | 200     | 35234   | 329778  | 108744  |
| 94626.8    | 44  | 5025724    | 5025724 | 0    | 0    | 207     | 114221  | 1096912 | 955119  |
| 94626.9    | 153 | 5203002    | 5203002 | 0    | 0    | 200     | 34006   | 444523  | 142456  |
| 94627.1    | 169 | 4838271    | 4838254 | 17   | 0    | 311     | 28628   | 842127  | 259681  |
| SRR1798201 | 13  | 4621112    | 4621112 | 0    | 0    | 934     | 355470  | 2185865 | 816039  |
| SRR2961886 | 121 | 4681757    | 4681748 | 9    | 0    | 212     | 38692   | 455207  | 96999   |
| SRR3928092 | 82  | 4219778    | 4219778 | 0    | 0    | 208     | 51460   | 360585  | 209220  |
| SRR7168035 | 35  | 5480168    | 5480168 | 0    | 0    | 252     | 156576  | 856464  | 590688  |
| SRR6003490 | 3   | 5399770    | 5399770 | 0    | 0    | 269404  | 1799923 | 2834956 | 2834956 |
| SRR6003504 | 20  | 4632136    | 4632136 | 0    | 0    | 1330    | 231606  | 1026751 | 942115  |
| SRR6003492 | 3   | 4657557    | 4657557 | 0    | 0    | 610475  | 1552519 | 2399914 | 2399914 |
| SRR6003492 | 23  | 4632353    | 4632353 | 0    | 0    | 1344    | 201406  | 942048  | 715679  |
| SRR6003494 | 21  | 4631732    | 4631666 | 66   | 0    | 1128    | 220558  | 1026536 | 929109  |
| SRR6003478 | 106 | 4820303    | 4820303 | 0    | 0    | 1031    | 45474   | 890616  | 302370  |
| SRR6003453 | 3   | 4825002    | 4825002 | 0    | 0    | 141660  | 1608334 | 2658027 | 2658027 |
| SRR6129961 | 15  | 4941717    | 4941217 | 500  | 0    | 1431    | 329447  | 1136207 | 537919  |
| SRR6003496 | 41  | 5058358    | 5058358 | 0    | 0    | 1009    | 123374  | 940562  | 760690  |
| SRR6487964 | 15  | 4564289    | 4564268 | 21   | 0    | 319     | 304285  | 754092  | 624002  |
| SRR8392523 | 47  | 5052428    | 5052324 | 104  | 0    | 1241    | 107498  | 1095066 | 592911  |

|            |     |         |         |       |   |        |         |         |         |
|------------|-----|---------|---------|-------|---|--------|---------|---------|---------|
| SRR5003446 | 192 | 5965364 | 5964401 | 963   | 0 | 249    | 31069   | 453184  | 140216  |
| SRR6003466 | 3   | 4974493 | 4974493 | 0     | 0 | 826252 | 1658164 | 2438388 | 1709853 |
| SRR6003449 | 17  | 4936467 | 4935982 | 485   | 0 | 1431   | 290380  | 1136163 | 537756  |
| SRR6003478 | 19  | 4939200 | 4938898 | 302   | 0 | 1022   | 259957  | 1136561 | 402427  |
| SRR6485881 | 576 | 3440061 | 3406226 | 33835 | 0 | 2509   | 5972    | 23925   | 6640    |
| SRR6487964 | 646 | 3929638 | 3881146 | 48492 | 0 | 2508   | 6083    | 27333   | 6876    |
| SRR6003475 | 3   | 4657555 | 4657555 | 0     | 0 | 610473 | 1552518 | 2399914 | 2399914 |
| SRR8450062 | 48  | 4365194 | 4365194 | 0     | 0 | 1223   | 90941   | 1387448 | 493634  |
| SRR3929697 | 60  | 4215398 | 4214849 | 549   | 0 | 1103   | 70256   | 382041  | 214995  |

**Table S3.** Reference strains for ANI based species assignment

| Reference strain                                | Genome ID |
|-------------------------------------------------|-----------|
| Ochrobactrum pituitosum strain AA2              | 571256.9  |
| Ochrobactrum rhizosphaerae strain SJY1          | 1437448.3 |
| Ochrobactrum grignonense strain OgA9a           | 94627.10  |
| Ochrobactrum cytisi strain IPA7.2               | 407152.3  |
| Ochrobactrum pseudogrignonense strain K8        | 419475.3  |
| Ochrobactrum thiophenivorans strain DSM 7216    | 571255.8  |
| Ochrobactrum oryzae strain OA447                | 335286.3  |
| Ochrobactrum tritici strain LMG 18957           | 94626.9   |
| Ochrobactrum anthropi ATCC 49188                | 439375.7  |
| Ochrobactrum pecoris strain 08RB2639            | 867683.3  |
| Ochrobactrum lupini strain LUP21                | 255457.3  |
| Ochrobactrum pseudintermedium strain CCUG 34735 | 370111.3  |
| Ochrobactrum gallinifaecis strain ISO 196       | 215590.7  |
| Ochrobactrum intermedium LMG 3301               | 641118.3  |
| Ochrobactrum haematophilum strain CCUG 38531    | 419474.10 |
